# Supplementary material for: Polymer informatics with multi-task learning
Source: PubMed Central journal article supplement — Patterns (N Y). 2021 Apr 9;2(4):100238. doi: 10.1016/j.patter.2021.100238 (PMC8085610; doi:10.1016/j.patter.2021.100238), 2021-04-09
Supplement: mmc1.pdf [file mmc1.pdf]

**Patterns, Volume 2**

**Supplemental information**

**Polymer informatics with multi-task learning**

**Christopher Kuenneth, Arunkumar Chitteth Rajan, Huan Tran, Lihua Chen, Chiho Kim, and Rampi Ramprasad**

Table S1: **Description of the 15 most important fingerprint components.**

| Component              | Description                                                                  |
|------------------------|------------------------------------------------------------------------------|
| e,main,chain,ring      | Ratio of non-H atoms in atomic rings vs. total number of atoms               |
| e,fam,acrylate         | 1 if the acrylate group is present, 0 otherwise                              |
| b,289                  | Number of methylene groups (R-CH <sub>2</sub> )                              |
| e,fam,polyamides       | 1 if the polyamide group is present, 0 otherwise                             |
| m,MQNs29               | Number of cyclic divalent nodes; normalized to the number of atoms           |
| e,ring,dist,shortest   | Shortest distance between two atomic rings                                   |
| a,C3,C3,C3             | Atomic triple C <sub>3</sub> -C <sub>3</sub> -C <sub>3</sub>                 |
| b,267                  | Number of methyl groups (R-CH <sub>3</sub> )                                 |
| e,side,chain,large,abs | Length of the longest side chain                                             |
| m,MQNs13               | Number of acyclic double bonds in repeat unit; normalized to number of atoms |
| b,239                  | Number of ethene groups (R-C <sub>2</sub> H <sub>4</sub> )                   |
| b,145                  | Number of phenylenes rings (R-C <sub>6</sub> H <sub>4</sub> -R ring)         |
| b,197                  | Number of C <sub>3</sub> H <sub>6</sub> groups                               |
| e,multi,ring,dimer     | 1 if two overlapping rings are present, 0 otherwise                          |
| b,349                  | Number of H atoms                                                            |

Table S2: **Compendium of RMSE and  $R^2$  values.** The RMSE and  $R^2$  values are fold averages of the five cross-validation models. The units of the RMSE values are specified in Table 1 of the publication.  $R^2$  values smaller than 0 are omitted.

|                      | RMSE  |       |       |         |         | $R^2$ |      |      |         |         |
|----------------------|-------|-------|-------|---------|---------|-------|------|------|---------|---------|
|                      | GP-ST | ST    | MT1   | MT2-all | MT2-sub | GP-ST | ST   | MT1  | MT2-all | MT2-sub |
| $T_m$                | 50.35 | 49.48 | 50.77 | 50.45   | 49.95   | 0.75  | 0.76 | 0.68 | 0.70    | 0.72    |
| $T_g$                | 33.56 | 33.76 | 37.24 | 36.88   | 36.19   | 0.90  | 0.89 | 0.85 | 0.86    | 0.87    |
| $T_d$                | 60.91 | 60.00 | 64.33 | 62.49   | 60.16   | 0.63  | 0.64 | 0.52 | 0.58    | 0.60    |
| $\lambda$            | 0.07  | 0.08  | 0.07  | 0.07    | 0.07    |       |      |      |         |         |
| $c_p$                | 0.19  | 0.17  | 0.20  | 0.22    | 0.25    | 0.60  | 0.57 | 0.54 | 0.19    |         |
| $E_{at}$             | 0.04  | 0.05  | 0.05  | 0.06    | 0.11    | 0.98  | 0.98 | 0.94 | 0.81    | 0.87    |
| $O_i$                | 9.85  | 7.78  | 7.37  | 8.64    | 7.56    |       | 0.26 | 0.31 |         | 0.26    |
| $X_c$                | 24.42 | 20.74 | 19.08 | 18.02   | 18.32   |       |      |      |         |         |
| $X_e$                | 17.99 | 14.71 | 17.45 | 14.21   | 12.56   |       |      |      |         |         |
| $\rho$               | 0.07  | 0.07  | 0.09  | 0.08    | 0.09    | 0.83  | 0.83 | 0.68 | 0.68    | 0.77    |
| $V_{ff}$             | 0.03  | 0.03  | 0.04  | 0.03    | 0.03    |       |      |      |         |         |
| $E_{gc}$             | 0.48  | 0.49  | 0.53  | 0.54    | 0.48    | 0.90  | 0.89 | 0.85 | 0.86    | 0.90    |
| $E_{gb}$             | 0.55  | 0.57  | 0.58  | 0.54    | 0.43    | 0.91  | 0.89 | 0.89 | 0.91    | 0.95    |
| $E_{ea}$             | 0.32  | 0.32  | 0.39  | 0.43    | 0.33    | 0.90  | 0.87 | 0.81 | 0.76    | 0.88    |
| $E_i$                | 0.42  | 0.45  | 0.45  | 0.41    | 0.36    | 0.77  | 0.74 | 0.70 | 0.71    | 0.83    |
| $n_c$                | 0.10  | 0.10  | 0.10  | 0.09    | 0.07    | 0.79  | 0.78 | 0.79 | 0.79    | 0.91    |
| $n_e$                | 0.09  | 0.06  | 0.06  | 0.04    | 0.03    |       | 0.63 | 0.66 | 0.78    | 0.90    |
| $\varepsilon_0$      | 0.53  | 0.54  | 0.54  | 0.47    | 0.39    | 0.68  | 0.71 | 0.67 | 0.71    | 0.86    |
| $\varepsilon_{1.78}$ | 1.05  | 1.02  | 0.92  | 0.75    | 0.50    |       |      |      | 0.43    | 0.72    |
| $\varepsilon_2$      | 1.10  | 1.05  | 0.97  | 0.76    | 0.44    |       |      |      | 0.20    | 0.83    |
| $\varepsilon_3$      | 1.12  | 1.13  | 0.99  | 0.72    | 0.63    |       |      |      | 0.29    | 0.64    |
| $\varepsilon_4$      | 0.71  | 0.65  | 0.59  | 0.52    | 0.27    |       | 0.28 | 0.09 | 0.32    | 0.88    |
| $\varepsilon_5$      | 0.93  | 1.11  | 0.79  | 0.44    | 0.31    |       |      |      | 0.15    | 0.78    |
| $\varepsilon_6$      | 0.86  | 0.77  | 0.77  | 0.56    | 0.40    |       |      |      |         | 0.59    |
| $\varepsilon_7$      | 0.48  | 0.42  | 0.36  | 0.41    | 0.22    |       |      |      |         | 0.26    |
| $\varepsilon_9$      | 0.63  | 0.70  | 0.67  | 0.62    | 0.32    |       |      |      |         |         |
| $\varepsilon_{15}$   | 0.33  | 0.20  | 0.19  | 0.14    | 0.12    |       | 0.62 | 0.60 | 0.78    | 0.87    |
| $\sigma_{ts}$        | 28.09 | 26.67 | 26.76 | 26.25   | 23.45   | 0.11  | 0.38 | 0.22 | 0.22    | 0.50    |
| $Y$                  | 0.98  | 0.93  | 0.90  | 0.83    | 0.80    |       | 0.38 | 0.13 | 0.35    | 0.49    |
| $\delta_s$           | 1.50  | 1.34  | 1.55  | 2.02    | 1.81    | 0.32  | 0.59 | 0.23 |         | 0.01    |
| $\mu_{H2}$           | 0.36  | 0.33  | 0.34  | 0.23    | 0.12    | 0.84  | 0.84 | 0.79 | 0.93    | 0.98    |
| $\mu_{He}$           | 0.26  | 0.30  | 0.30  | 0.21    | 0.13    | 0.86  | 0.82 | 0.77 | 0.91    | 0.97    |
| $\mu_{N2}$           | 0.33  | 0.34  | 0.32  | 0.22    | 0.12    | 0.85  | 0.85 | 0.82 | 0.93    | 0.98    |
| $\mu_{O2}$           | 0.37  | 0.36  | 0.34  | 0.22    | 0.13    | 0.84  | 0.84 | 0.82 | 0.94    | 0.98    |
| $\mu_{CH4}$          | 0.34  | 0.35  | 0.32  | 0.25    | 0.13    | 0.87  | 0.86 | 0.84 | 0.92    | 0.98    |
| $\mu_{CO2}$          | 0.39  | 0.43  | 0.40  | 0.28    | 0.19    | 0.88  | 0.84 | 0.81 | 0.93    | 0.97    |
